# Supplementary material for: Leveraging Night-Time Lights (NTL) data to fingerprint the impact of the 2022 Indus floods
Source: Research Square preprint supplement (doi:10.21203/rs.3.rs-8662620/v1), 2026-01-29
Supplement: Supplementary file 1 [file 73c09fbbf818ce3491af6caf.pdf]

# Leveraging Night-Time Lights (NTL) data to fingerprint the impact of the 2022 Indus floods

Ekta Aggarwal<sup>a,b</sup>, Alexander C. Whittaker<sup>a</sup>, Philippa Mason<sup>a</sup>, Kartikeya S. Sangwan<sup>a</sup>, Fritz Schlunegger<sup>c</sup>, Sanjeev Gupta<sup>a</sup>

<sup>a</sup> Department of Earth Science and Engineering, Imperial College London, SW7 2AZ, UK

<sup>b</sup> School of Geography and Environmental Sciences, University of Southampton, SO17 1BJ, UK

<sup>c</sup> Institute of Geological Sciences, University of Bern, 3012, Switzerland

## Supplementary Information:

**Supplementary Table 1:** Descriptive Statistics of the NTL pixels from May to November 2022 cloud-free composites within the cloud mask (derived from the August composite)

| Month     | WOY     | Mean     | Sum    | Min | Max  | Std Dev |
|-----------|---------|----------|--------|-----|------|---------|
| May       | 2022-18 | 0.892593 | 609466 | 0   | 2892 | 10      |
| June      | 2022-23 | 0.808739 | 552205 | 0   | 5119 | 15      |
| August    | 2022-34 | 0        | 0      | 0   | 0    | 0       |
| September | 2022-36 | 0.656296 | 448224 | 0   | 3900 | 12      |
| October   | 2022-40 | 0.803781 | 548754 | 0   | 4120 | 15      |
| November  | 2022-47 | 0.829722 | 566604 | 0   | 4279 | 13      |

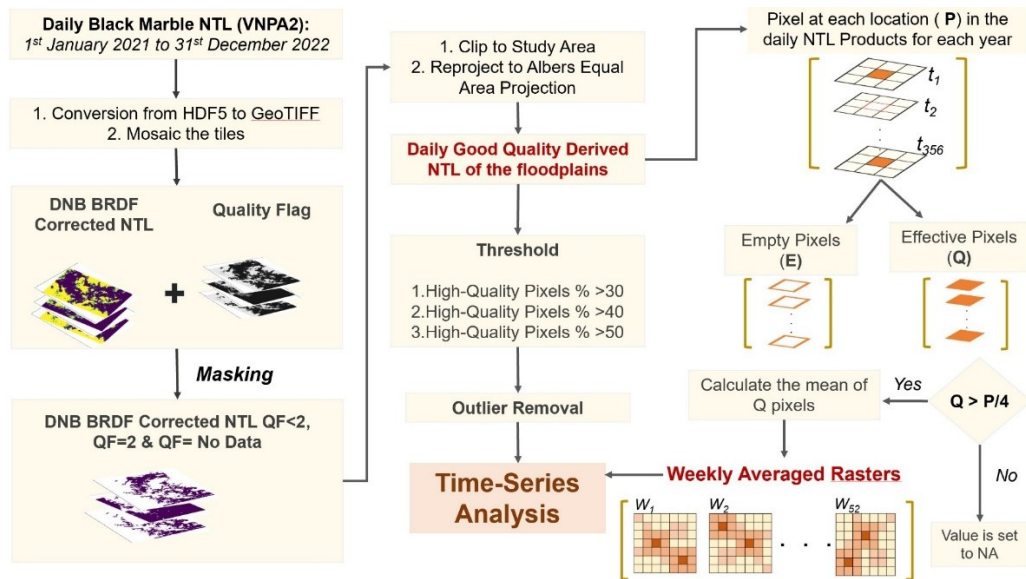

**Supplementary Fig. 1:** A schematic flowchart showing the detailed methodology explaining the pre-processing of daily raster data and creating weekly raster data. The processed good-quality daily and weekly rasters are used for time-series analysis and identifying impact areas.

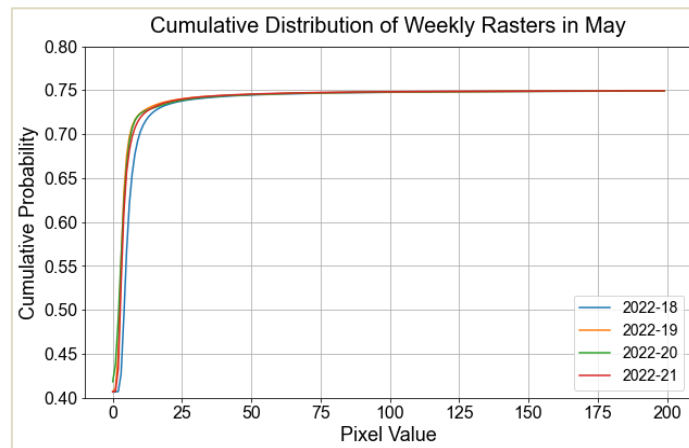

**Supplementary Fig. 2:** Cumulative distribution of weekly NTL raster for May 2022. The blue line denotes the cumulative plot for the 18<sup>th</sup> week of 2022. Similarly, orange, green and red lines show the cumulative distribution curve for the 19<sup>th</sup>, 20<sup>th</sup> and 21<sup>st</sup> week, respectively.
